1 **From drift to draft: How much do beneficial mutations actually contribute to**  
2 **predictions of Ohta's slightly deleterious model of molecular evolution?**

3

4

5 **Jun Chen<sup>\*,†</sup> Sylvain Glémin<sup>\*,§</sup>, Martin Lascoux<sup>\*,‡</sup>**

6 <sup>\*</sup>Program in Plant Ecology and Evolution, Department of Ecology and Genetics,  
7 Evolutionary Biology Centre, Uppsala University, 75236 Uppsala, Sweden

8 <sup>§</sup>Université de Rennes, CNRS, ECOBIO [Ecosystèmes, Biodiversité, Evolution] -

9 UMR 6553, F-35000 Rennes, France

10

11 <sup>†</sup>Present address: College of Life Sciences, Zhejiang University, Hangzhou, Zhejiang  
12 310058, China

13

14

15 <sup>‡</sup>Author for correspondence: [Martin.Lascoux@ebc.uu.se](mailto:Martin.Lascoux@ebc.uu.se)

16 **Abstract**

17 Since its inception in 1973 the slightly deleterious model of molecular evolution,  
18 aka the Nearly Neutral Theory of molecular evolution, remains a central model to  
19 explain the main patterns of DNA polymorphism in natural populations. This is  
20 not to say that the quantitative fit to data is perfect. In a recent study CASTELLANO  
21 *et al.* (2018) used polymorphism data from *D. melanogaster* to test whether, as  
22 predicted by the Nearly Neutral Theory, the proportion of effectively neutral  
23 mutations depends on the effective population size ( $N_e$ ). They showed that a  
24 nearly neutral model simply scaling with  $N_e$  variation across the genome could  
25 not explain alone the data but that consideration of linked positive selection  
26 improves the fit between observations and predictions. In the present article we  
27 extended their work in two main directions. First, we confirmed the observed  
28 pattern on a set of 59 species, including high quality genomic data from 11  
29 animal and plant species with different mating systems and effective population  
30 sizes, hence *a priori* different levels of linked selection. Second, for the 11 species  
31 with high quality genomic data we also estimated the full Distribution of Fitness  
32 Effects (DFE) of mutations, and not solely the DFE of deleterious mutations. Both  
33  $N_e$  and beneficial mutations contributed to the relationship between the  
34 proportion of effectively neutral mutations and local  $N_e$  across the genome. In  
35 conclusion, the predictions of the slightly deleterious model of molecular  
36 evolution hold well for species with small  $N_e$ . But for species with large  $N_e$  the fit  
37 is improved by incorporating linked positive selection to the model.

38

39 **Keywords:** Nearly Neutral Theory, Distribution of Fitness Effects, beneficial  
40 mutations, linked selection

41

## 42 **Introduction**

43

44 The year 2018 saw the celebration of the 50<sup>th</sup> anniversary of the Neutral Theory  
45 of molecular evolution (called simply the Neutral Theory thereafter). At 50 years  
46 of age, the Neutral Theory is still shrouded in controversies, some pronouncing it  
47 dead and overwhelmingly rejected by facts (Kern and Hahn 2018) while others  
48 see it as very much alive and kicking (Nei *et al.* 2010; Jensen *et al.* 2019). As a  
49 quick glance at major textbooks in population genetics and at the literature  
50 would suggest, it seems fair to say that the Neutral Theory is certainly not totally  
51 dead. Even if it undoubtedly did lose some of its initial appeal it continues to play  
52 a central role in population genetics, a position well summarized by Kreitman  
53 (1996) in his spirited essay “The neutral theory is dead. Long live the Neutral  
54 Theory”. Shortcomings of the Neutral Theory were already noted in the 1970s  
55 and the Neutral Theory has itself evolved. Indeed, its inadequacy to fully explain  
56 the data, in particular the constancy of the molecular clock, was already noted in  
57 1973, leading Tomoko Ohta (1973) to propose the Nearly Neutral Theory of  
58 molecular evolution. In contrast to the Neutral Theory where most mutations are  
59 assumed to be neutral or strongly deleterious, the Nearly Neutral Theory assigns  
60 much more prominence to the contribution to standing polymorphism of  
61 mutations that are weakly selected and effectively neutral (Ohta 1992; Ohta and  
62 Gillespie 1996). Weakly selected mutations can be slightly deleterious or slightly  
63 beneficial, but as noted by Kreitman (1996) the best developed of the weak  
64 selection models primarily considers slightly deleterious mutations and was  
65 therefore christened by him “the slightly deleterious model”. This is the model  
66 that we will be testing in most of the present paper.

67

68 Like the Neutral Theory, however, the Nearly Neutral Theory still assumes that  
69 “only a minute fraction of DNA changes in evolution are adaptive in nature”  
70 (Kimura 1983). Under this view, polymorphism is thought to be mostly  
71 unaffected by positive selection, except around the few recently selected  
72 beneficial alleles (selective sweeps). This was already at variance with the view  
73 put forward by Gillespie (e.g. Gillespie 2004) that assigned a greater role to  
74 linked positive selection in shaping polymorphism (see also CORBETT-DETIG *et al.*

75 2015) and is in even stronger contrast with the claim by Kern and Hahn (2018)  
76 that “natural selection has played the predominant role in shaping within- and  
77 between-species genetic variation” and that “the ubiquity of adaptive variation  
78 both within and between species” leads to the rejection of the universality of the  
79 Neutral Theory. In a far more nuanced assessment of the Neutral Theory and its  
80 contribution, Jensen *et al.* (2018) argued that the effects of linked selection could  
81 readily be incorporated in the Nearly Neutral framework. The heart of the  
82 dispute, either today or in the early days of the Nearly Neutral Theory, is about  
83 the degree to which each category of mutations contributed directly and  
84 indirectly to genetic variation within- and between-species.

85

86 A core prediction of the Nearly Neutral Theory is that the fraction of mutations  
87 affected by selection depends on  $N_e$  (Ohta 1973).  $N_e$  can vary among species but  
88 also within a genome because of linked selection (reviewed in Ellegren and  
89 Galtier 2016). The effect of selection against deleterious mutations on linked  
90 neutral variants – background selection (Charlesworth *et al.* 1993) – is often  
91 modeled by a simple re-scaling of  $N_e$  but except in specific situations effects of  
92 linked selection are more complex and there is not a single re-scaling (Barton  
93 1995; Zeng 2013; Comeron 2017; Cvijovic *et al.* 2018; Torres *et al.* 2019). In the  
94 case of beneficial mutations, for instance, the interference depends both on the  
95 beneficial effect of the sweeping mutation and on selection acting at linked sites  
96 (Barton 1995; Weissman and Barton 2012).

97

98 Evidence that linked positive selection and not only direct selection on slightly  
99 deleterious and beneficial mutations contributed to the relationship between the  
100 fraction of mutations affected by selection and  $N_e$  has recently been obtained by  
101 Castellano *et al.* (2018). Using two *Drosophila melanogaster* genome re-  
102 sequencing datasets, Castellano *et al.* (2018) tested a prediction of the slightly  
103 deleterious model first obtained by Kimura (1979) and then extended by Welch *et al.*  
104 *et al.* (2008). Welch *et al.* (2008) showed that if one considers only deleterious  
105 mutations, the logarithm of the ratio of nucleotide diversity at non-synonymous  
106 and synonymous amino acid changes is linearly related to the logarithm of the  
107 effective population size and that the slope of this log-log regression line is equal

108 to the shape parameter of the Distribution of Fitness Effects (DFE),  $\beta$ , if the DFE  
109 of deleterious mutations is modeled by a Gamma distribution:

110

$$111 \ln(\pi_N/\pi_S) \approx -\beta \ln(N_e) + \text{constant} \quad [\text{Eq. 1a}]$$

112

113 where  $\pi_N$  is the nucleotide diversity at non-synonymous sites and  $\pi_S$  is the  
114 nucleotide diversity at synonymous sites.

115

116 Or, rewriting this expectation by using  $\pi_S$  as a proxy for  $N_e$ :

117

$$118 \ln(\pi_N/\pi_S) \approx -\beta \ln(\pi_S) + \text{constant}' \quad [\text{Eq. 1b}]$$

119

120 The second equation holds only if variation in  $\pi_S$  solely depends on variation in  
121  $N_e$ , and that there is no correlation between the mutation rate and  $N_e$ . It should  
122 also be pointed out that the DFE used here only considers deleterious mutations,  
123 as estimated for instance by DFE-alpha (Eyre-Walker and Keightley 2009). A  
124 direct test of this prediction using among-species comparison can be problematic  
125 if mutation rates cannot be controlled for. To circumvent this problem,  
126 Castellano *et al.* (2018) used within genome variation in  $N_e$ , under the reasonable  
127 assumption that variation in mutation rates are negligible compared to variation  
128 in  $N_e$  across a genome. They found (see also James et al. 2017) that the slope was  
129 significantly steeper than expected under a simple scaling of  $N_e$  and simulations  
130 indicated that linked positive selection, but not background selection, could  
131 explain this discrepancy. The effect of linked selection on the relationship  
132 between  $\pi_N/\pi_S$  and  $\pi_S$  is twofold. First it increases stochasticity in allele  
133 frequencies, or, in other words, decreases the local effective population size.  
134 Second, linked selection leads to non-equilibrium dynamics. Genetic diversity  
135 will recover faster for deleterious than neutral mutations, altering the  
136 relationship between  $\pi_N/\pi_S$  and  $\pi_S$  (Brandvain and Wright, 2016; Do et al. 2015;  
137 Gordo and Dionisio 2005; Vigué and Eyre-Walker 2019). More precisely, the  
138 more a region is affected by selective sweeps, the lower  $\pi_S$  is and the higher  
139  $\pi_N/\pi_S$  is compared to the equilibrium expectation: this effect makes the slope  
140 steeper compared to the equilibrium expectation.

141

142 In the present paper, we first confirmed the observed pattern on the set of 59  
143 species used in Chen *et al.* (2017). We then used 11 high quality genomic  
144 datasets for which an outgroup is available to test whether the results obtained  
145 by Castellano *et al.* (2018) hold more generally and, in particular, in species with  
146 much smaller effective sizes than *D. melanogaster*, and with different levels of  
147 linkage disequilibrium. While we adopted the same general approach than  
148 Castellano *et al.* (2018), our analysis differed from theirs in one important  
149 respect. In their study, Castellano *et al.* (2018) only characterized the DFE of  
150 deleterious mutations. We, instead, used a newly developed approach, *polyDFE*  
151 (Tataru *et al.* 2017), that also considers positive mutations, which is expected to  
152 improve the estimation of the shape of the DFE of deleterious mutations and to  
153 disentangle the direct effects of both positive and negative selection.

154

## 155 **Material & Methods**

156

### 157 *Genomic data and regression of $\pi_N/\pi_S$ over $\pi_S$*

158

159 In a first step we re-analyzed the 59 species from Chen *et al.* (2017), which  
160 included 34 animals and 28 plant species. We estimated the DFE using folded site  
161 frequency spectra with the same method as in Chen *et al.* (2017) and calculated  
162 the slope (regression coefficient of  $\log(\pi_N/\pi_S)$  over  $\log(\pi_S)$ ) as described in the  
163 next paragraph. For DFE estimation using folded SFS the model assumes a  
164 gamma distribution for deleterious mutations and takes demography (or  
165 sampling or any departure from equilibrium) into account by introducing  $n-1$   
166 nuisance parameters for an SFS of size  $n$  (the corresponding code was provided  
167 in Chen *et al.* (2017)). In later analyses that required unfolded site frequency  
168 spectra, we retained 11 species with high quality genomic datasets and with an  
169 available outgroup. These eleven species are given in Table 1. They include both  
170 animal and plant species with contrasted levels of nucleotide polymorphism and  
171 mating systems. For each of the eleven species, we aligned short reads to the  
172 genome using BWA-mem (Li and Durbin 2010) and sorted the alignment using  
173 SAMtools. PCR duplicates were removed and INDELS were realigned using GATK

174 toolkit (McKenna *et al.* 2010). HaplotypeCaller was used for individual genotype  
175 identification and joint SNP calling was performed across all samples using  
176 GenotypeGVCFs. Variant and invariant sites were kept only if genotypes of all  
177 individuals were successfully identified (Carson *et al.* 2014). We collected Single  
178 Nucleotide Polymorphism (SNPs) in all CDS regions and calculated genetic  
179 diversity of 4-fold and 0-fold sites as proxies for polymorphism at synonymous  
180 ( $\pi_S$ ) and non-synonymous sites ( $\pi_N$ ). Sites were all masked with 'N' and excluded  
181 from further computation in the following four cases: heterozygous sites in  
182 selfing species, sites with more than two variants, variants at sites within five  
183 bases of a flanking INDEL, and missing individuals. We applied the same SNP  
184 sampling strategy as in James *et al.* (2017) and Castellano *et al.* (2018) in order  
185 to remove potential dependency between estimates of  $\pi_N/\pi_S$  and  $\pi_S$ . In brief, we  
186 first split all synonymous SNPs into three groups (S1, S2, and S3) using a  
187 hypergeometric sampling based on the total number of synonymous sites. To bin  
188 genes and reduce the difference in number of SNPs in each bin, we ranked genes  
189 according to their Watterson's estimate of nucleotide diversity ( $\theta_{S1}$ ) and grouped  
190 these ranked genes into 20 bins each representing approximately 1/20 of the  
191 total number of synonymous SNPs. We then used  $\pi_{S2}$  to estimate the  $\pi_N/\pi_S$   
192 (mean  $\pi_N$  divided by mean  $\pi_S$  in each bin) ratio and  $\pi_{S3}$  as an independent  
193 estimate of the genetic diversity of each bin.

194

195 We calculated the slope of the linear regression ( $l$ ) of the log-transformed value  
196 of the  $\pi_N/\pi_S$  ratio on the log-transformed value of  $\pi_S$ , using the "lm" function in R  
197 (R Core Team 2018). In pilot runs on 59 species (population data of Chen *et al.*  
198 (2017)), the estimates of  $l$  showed extensive variation depending on, among  
199 other things, the qualities of genome sequencing, read depth, annotation and SNP  
200 calling. Thus, we selected 11 species for which a high-quality genome sequence  
201 and an outgroup were available. Individuals were selected from the same genetic  
202 background, i.e. admixture or population structure were carefully removed. At  
203 least 20 alleles (i.e. 10 individuals for outcrossing species or 20 for selfing  
204 species) were retained from a single ancestral cluster defined in  
205 Admixture/Structure analysis in the original publication. For the two *Capsella*  
206 species, we performed Admixture analysis for both species separately. A series

207 of quality controls for  $l$  calculation were performed as described in the following.  
208 The longest transcript for each gene model was kept only if it contained both  
209 start and stop codons (putative full length) and no premature stop codons. SNPs  
210 flanking five bases of INDEL were masked to avoid false positive calls. A grid of  
211 filtering criteria (see details in Table S2) was also implemented on each species  
212 based on sequence similarity against Swiss-Prot database (e-value, bit-score,  
213 query coverage) and sequencing quality (sites with low read depth or ambiguous  
214 variants). We selected the filtering criteria in order to maximize the adjusted  $R^2$   
215 in the log-log regression of  $\pi_N/\pi_S$  on  $\pi_S$ . By doing so we aimed to reduce the error  
216 introduced by annotation and quality difference between model and non-model  
217 organisms. Also, to evaluate the variance introduced by random sampling and  
218 grouping of SNPs, we performed 1,000-iteration bootstraps to get the bootstrap  
219 bias-corrected mean and 95% confidence intervals for  $l$  calculations.

220

#### 221 *Estimates of the distributions of fitness effects*

222

223 The distribution of fitness effects (DFE) for all non-synonymous mutations  
224 across the genome was first calculated by considering only deleterious  
225 mutations. We first re-used the DFE parameters estimated in 59 animal and  
226 plant species in Chen *et al.* (2017) that assumes that only neutral and slightly  
227 deleterious mutations contribute to genetic diversity. In brief, in this previous  
228 study the DFE was modeled using a gamma distribution with mean  $S_d$  and shape  
229 parameter  $\beta$ . Folded site frequency spectra (SFS) were compared between  
230 synonymous and nonsynonymous sites and demography (or any departure from  
231 equilibrium) was taken into account by introducing  $n-1$  nuisance parameters for  
232 an unfolded SFS of size  $n$ , following the method proposed by Eyre-Walker *et al.*  
233 (2006). The possible issues and merits of this approach compared to those  
234 based on an explicit (albeit very simplified) demographic model have been  
235 discussed previously and the method introduced by Eyre-Walker *et al.* (2006)  
236 has proved to be relatively efficient (Eyre-Walker and Keightley 2007; Tataru *et al.*  
237 2017). The calculations were carried out using an in-house Mathematica  
238 script implementing the method of Eyre-Walker *et al.* (2006) provided in  
239 supplementary S2 file of Chen *et al.* (2017).



240 However, for species with large effective population sizes, like *D. melanogaster*,  
241 ignoring the effects of beneficial mutations could distort the DFE to a great  
242 extent and lead to a wrong estimate of  $\beta$ . Therefore, we further estimated the  
243 DFE under a full model that takes both deleterious and beneficial mutations into  
244 account (Tataru *et al.* 2017) using unfolded SFS for 11 species. Briefly, the model  
245 mixes the gamma distribution of deleterious mutations (shape= $\beta$ , mean= $S_d$ ) with  
246 an exponential distribution of beneficial mutations (mean= $S_b$ ), in proportions of  
247  $(1-p_b)$  and  $p_b$ , respectively. The unfolded SFS was calculated for the 11 retained  
248 species, for which a closely related outgroup with similar sequencing quality was  
249 available to polarize the SFS. Ancestral state was assigned as the state of the  
250 outgroup if the outgroup was monomorphic for one of the two variants, and the  
251 derived allele frequency was calculated from this polarization. Otherwise (in the  
252 case of missing data, polymorphic site or third allele in the outgroup) the site  
253 was masked. The percentage of SNPs that could not be polarized and were  
254 masked varied between 0 and 29.3% with a mean of 4.6% and a median value of  
255 0.5% (Table S2).

256 In addition, since polarization errors could remain, the error rate of the ancestral  
257 state assignment ( $\epsilon_{an}$ ) was also taken into account in *PolyDFE*. The “gamma” DFE  
258 (that only considers deleterious mutations) and the full DFE were estimated for  
259 each species. In both cases a nuisance parameter was also fitted to account for  
260 possible mis-assignment errors in SNP ancestral allele estimation (a step  
261 required to obtain the unfolded SFS). Note that, although we used outgroups to  
262 polarize SFSs, we did not use divergence but only polymorphism to estimate the  
263 effect of beneficial mutations. This is at the cost of larger variance in estimates  
264 but it avoids the (potentially strong) bias due to ancient variations in  $N_e$  that

265 cannot be captured by modeling recent changes in population size (Rouselle et  
266 al. 2018). When comparing the estimates of the DFE among several species, the  
267 problem arises that the best model is not necessarily the same for all species (the  
268 best model can include or not beneficial mutations and include or not  
269 polarization errors). Comparisons cannot be fairly done if all species do not  
270 share the same model. Alternatively, estimations under an over-parameterized  
271 model can lead to large variance and extreme values. To circumvent this problem,  
272 we used a model averaging procedure where each parameter of interest ( $\beta$ ,  $S_b$ ,  $S_d$ ,  
273 and  $p_b$ ) is estimated as a weighted mean of estimates obtained under four models:  
274 the Gamma DFE and the full DFE models, including polarization errors or not.  
275 The weights given to the estimate from model  $k$  is  $w_k = e^{-1/2\Delta AIC_k}$  where  
276  $\Delta AIC_m = AIC_m - AIC_{min}$  with AIC being the Akaike Information Criterion and  
277  $AIC_{min}$  the minimum AIC among the four models (Posada and Buckley 2004). All  
278 calculations were performed using the software *polyDFE* and the associated R  
279 script (Tataru *et al.* 2017).

280

### 281 *Expectations under different selection models*

282

283 Independently of possible indirect effects of selective sweeps, [Eq. 1] only  
284 considers deleterious mutations, in line with the initial view of the Nearly  
285 Neutral Theory where beneficial mutations negligibly contribute to  
286 polymorphism (Ohta 1973). Giving more weight to beneficial mutations slightly  
287 modified the relationship between the slope of the linear regression,  $l$ , and the  
288 shape parameter,  $\beta$ . For beneficial mutations only, the equivalent of [Eq. 1] is  
289 simply (see Appendix):

290

$$291 \ln(\pi_N/\pi_S) \approx +\beta_b \ln(N_e) + constant \quad [\text{Eq. 2}]$$

292

293 where  $\beta_b$  is the shape of the distribution of beneficial mutations, still assuming a  
294 gamma distribution, so  $\beta_b$  would be 1 in the statistical framework we used. Thus,  
295 the  $\pi_N/\pi_S$  ratio increases with  $N_e$ , so that considering beneficial mutations the  
296 global  $\pi_N/\pi_S$  decreases more slowly than when only deleterious mutations are  
297 taken into account. Thus, with beneficial mutations the slope will always be  
298 lower than without. For the majority of species beneficial mutations are rare  
299 ( $p_b \ll 1$ ) and thus  $b$  (thereafter we define  $b = -l$ ) is approximately equal to  $\beta$ . For  
300 those with a relatively high proportion of beneficial mutations, direct positive  
301 selection should result in a flattened slope, i.e. a smaller value of  $b$  than  $\beta$ . As we  
302 mostly observed the reverse pattern,  $b > \beta$ , the observed discrepancy cannot be  
303 explained by the direct effect of beneficial mutations.

304

#### 305 *Trends across the genome and tests for selection*

306

307 For each of the 20 bins defined above and ranked according to their mean  
308 synonymous nucleotide diversity we calculated  $\beta$ ,  $p_b$  and  $S_b$  values and a  
309 summary statistic of the site frequency spectrum, Tajima's D (Tajima 1989).  
310 Tajima's D tests for an excess of rare over intermediate variants compared to the  
311 frequencies expected under the standard coalescent and was calculated from  
312 synonymous sites. Demography does affect Tajima's D and can explain the  
313 difference among species. However, a negative Tajima's D is also expected under  
314 recurrent selective sweeps (Jensen *et al.* 2005; Pavlidis and Alachiotis 2017) and  
315 should be more negative in genomic regions more strongly affected by linked  
316 positive selection. Background selection can also affect Tajima's D in the same  
317 direction but much more weakly (Charlesworth *et al.* 1995). Independently of  
318 the species mean value, we thus expect a strong positive relationship between  
319 recombination and Tajima's D in species where linked positive selection is  
320 prominent.

321

#### 322 *Forward simulations under selective sweep scenario*

323

324 The code developed by Castellano *et al.* (2018) which is based on forward  
325 simulations using the software SLiM, version 3.2.1 (Haller and Messer 2019) was

326 modified to assess the effect of parameters  $p_b$ ,  $S_b$ , and  $N$  on  $b$  and Tajima's  $D$ .  
327 More specifically, a 20-kb genomic region was simulated with a mutation rate of  
328  $1 \times 10^{-6}$  to study the behavior of  $b$  and Tajima's  $D$  under selective sweep scenarios  
329 with varying parameters of  $p_b$ ,  $S_b$ , and  $N$ . First, we simulated equal amounts of  
330 neutral and deleterious mutations whose fitness effects were drawn from a  
331 gamma distribution with a shape parameter 0.4 and a mean  $s_d$  of -10. Different  
332 percentages of beneficial mutations ( $p_b = 1\%$ ,  $0.8\%$ ,  $0.5\%$ ,  $0.4\%$ ,  $0.3\%$ ,  $0.2\%$ ,  
333  $0.01\%$ ,  $0.005\%$  and  $0$ ) were drawn randomly from a distribution with a fixed  $s_b$   
334 of 1 to simulate loci experiencing selective sweeps at different frequency and we  
335 then calculated  $b$  (Fig. 5 of Castellano et al (2018)) and Tajima's  $D$ . We also  
336 investigated the behavior of  $b$  and Tajima's  $D$  by varying  $s_b$  (1, 0.5, 0.1),  $N$  (100,  
337 500, 1000) and the recombination rate ( $Nr=0$ ,  $1e-3$ ,  $1e-2$ ). Simulated values were  
338 averaged across 50 samples, which were taken every  $5N$  generations after an  
339 initial burn-in period of  $10N$  generations.

340

## 341 **Results**

342

343 *b and  $\beta$  are generally similar but the variance is large*

344

345 One of the most important predictions of the Nearly Neutral Theory is that the  
346 proportion of effectively neutral mutations is a function of the effective  
347 population size (Kimura and Ohta 1971; Ohta 1972; Ohta 1973; Ohta 1992). In  
348 species with large effective population size, selection is efficient and the  
349 proportion of effectively neutral mutations is small. Here we used the ratio of  
350 genetic diversity at 0-fold over 4-fold degenerate sites ( $\pi_N/\pi_S$ ) in protein coding  
351 regions as a measure of the proportion of effectively neutral mutations and  
352 examined the linearity between  $\log(\pi_N/\pi_S)$  and  $\log(\hat{N}_e)$  across the genomes of  
353 59 species used in Chen *et al.* (2017). The slope (linear regression coefficient  
354 between  $\log(\pi_N/\pi_S)$  and  $\log(\hat{N}_e)$ ) was negative for 51 of the 59 species ( $l < 0$ ),  
355 although it was significantly different from zero at  $p=0.05$  in less than half of the  
356 species (28/59). The value of  $l$  varied from -0.424 (*D. melanogaster*) to 0.22  
357 (*Callithrix jacchus*) (Table S1). Since balancing selection can lead to both high  $\pi_S$

358 and  $\pi_N/\pi_S$ , it can generate an increase in  $\pi_N/\pi_S$  for high- $\pi_S$  bins. We thus  
359 removed the five bins with the highest diversity and recalculated  $l$  values for all  
360 species. This reduced the  $l$  values of 36 species and led to negative  $l$  values in 55  
361 species.

362

363 We further examined the DFE for mutations across the genome in the same  
364 datasets. A gamma distribution with two parameters, mean ( $S_d$ ) and shape ( $\beta$ ),  
365 was used to describe the distribution of deleterious mutations under purifying  
366 selection. Importantly, the contribution of beneficial mutations, even those under  
367 weak selection that are potentially behaving neutrally, is ignored in this case.  
368 Estimates of the shape parameter,  $\beta$ , varied from 0.01 (*C. jacchus*) to 0.347 (*D.*  
369 *melanogaster*) but were only weakly correlated with effective population size  
370 (Table S1).

371

372 Considering only deleterious mutations and assuming a simple scaling of  $N_e$   
373 variation across the genome, the slightly deleterious model predicts that the  
374 value of the slope of the linear regression between  $\log(\pi_N/\pi_S)$  and  $\log(\hat{N}_e)$ ,  $b$   
375 (recall that  $b = -l$ ), is equal to  $\beta$  (Welch *et al.* 2008). The discrepancy between the  
376 two might indicate a departure from this model, and Castellano *et al.* (2018)  
377 suggested that in *D. melanogaster*, where the observed slope was steeper than  
378 expected, the departure was caused by linked positive selection across the  
379 genome. We observed a general consistency between  $\beta$  and  $b$  as estimators of  
380 effective neutrality (linear coef. = 1.04, intercept=0.007, p-value<2e-16, adjusted  
381  $R^2=0.35$ , Fig. 1A). The difference ( $\Delta=b-\beta$ ) was small in 40 species and varied  
382 from -0.1 to 0.1 (Fig. 1B). In 36 species (61%)  $b$  values were larger than  $\beta$  and in  
383 23 species (39%)  $\beta$  was larger than  $b$ . However, the variation in  $\Delta$  was not  
384 explained by  $\pi_S$  or  $N_e$  as the adjusted  $R^2$  was only 0.06. Removing the five bins  
385 with the highest diversity, the correlation between  $\beta$  and  $b$  was still significant  
386 (coef. 0.89, p-value=2.14e-6). The median value of  $\Delta$  increased from 0.0085 to  
387 0.045 but there was still no correlation between  $\Delta$  and  $\hat{N}_e$ .

388

389 *The effects of quality control and full DFE model*

390

391 The variation in  $\Delta$  may come from two sources. First, it can be due to the  
392 estimation quality of  $b$  and  $\beta$ . Tests have shown that quality control on  
393 sequencing and SNP-calling can have a dramatic influence on  $b$  calculations and  
394 ignoring beneficial mutations in DFE model could also distort the estimates of  $\beta$   
395 (Tataru *et al.* 2017). Second, the variation in  $\Delta$  can be caused by departures from  
396 the assumptions underlying the simple version of the Nearly Neutral Theory, for  
397 instance a larger role of direct or linked positive selection than assumed by the  
398 theory.

399

400 To assess the relative importance of these two sources we selected 11 species  
401 with genomic data of high quality and performed a series of stringent quality  
402 controls (see details in M&M) before re-estimating  $b$ . This improved the  
403 goodness of fit for the log linear regression between  $\pi_N/\pi_S$  and  $\pi_S$  across the  
404 genome and  $b$  estimates were significantly different from zero for all 11 species  
405 (Table 1 and Fig. 2, see also details in Table S2 and Fig. S1). For estimating  $\beta$ , we  
406 used closely related species to polarize the SFS and applied both the gamma DFE  
407 model and the full DFE model implemented in *polyDFE*, which considers both  
408 deleterious and beneficial mutations. Instead of choosing the best DFE model, an  
409 average value weighted by the different models' AIC scores was calculated for  
410 each parameter (Tataru and Bataillon 2019).

411

412 In this case we observed a better correlation between  $b$  and  $\beta$  ( $\rho = 0.727$ ,  $p$ -  
413 value=0.011) than when we considered the 59 species and used only a gamma  
414 DFE. In addition, considering beneficial mutations slightly increases  $\beta$  estimates,  
415 making them closer to  $b$ . However, the linear coefficient between  $b$  and  $\beta$  (1.26)  
416 is significantly higher than one and the variation of  $\Delta$  remains large (-0.026 ~  
417 0.289) suggesting that some additional factors may lie behind the remaining  
418 variation.

419

420 *The roles of effective population size and positive selection*

421

422 We then tested if the variation in  $\Delta$ , where  $\Delta=b-\beta$ , could simply reflect  
423 differences in effective population size ( $N_e$ ) among species. Estimates of  $N_e$  were  
424 obtained by rescaling  $\pi_s$  using estimates of the mutation rate ( $\mu$ ) from the  
425 literature (see Table S3 for the sources of the  $\mu$  estimates). When  $\Delta$  is regressed  
426 against  $\log(\hat{N}_e)$ ,  $\log(\hat{N}_e)$  explained up to 49% of the variance in  $\Delta$  (p-  
427 value=0.014). Considering the uncertainty in  $\mu$ , we also regressed  $\Delta$  on  $\log(\pi_s)$ ,  
428 and obtained similar results ( $R^2=0.41$ , p-value=0.019, Fig. 3).

429  
430 Furthermore, we tested whether species with potentially more selective sweeps  
431 show higher  $\Delta$ , as predicted by Castellano *et al.* (2018). An explicit model of  
432 selective sweeps is difficult to fit given the uncertainty about beneficial  
433 mutations parameters and would require additional information, especially on  
434 the recombination map of the different species. Alternatively, we qualitatively  
435 reasoned that, in addition to be more frequent when the effective population is  
436 large, the number of selective sweeps should increase with both the proportion  
437 ( $p_b$ ) and the mean strength of beneficial mutations ( $S_b$ ).  $\log(S_b)$  had a significant  
438 and positive effect on  $\Delta$  (p-value=0.0018, Fig. 3) and explained 64.3% of the  
439 variance in  $\Delta$  but the effect of  $p_b$  was not significant (p-value=0.29). When  
440 considered together, the effects of both  $\log(S_b)$  and  $\log(\pi_s)$  (or  $\hat{N}_e$ ) in the joint  
441 model explained up to 78% of the variance in  $\Delta$  (p-value=0.0068 and 0.059,  
442 respectively, Table 2). However, no significant effect of  $p_b$  could be detected  
443 either in the single regression model (p-value=0.29) or joint model with other  
444 variables (p-value=0.15). The rate of adaptive evolution relative to the neutral  
445 mutation rate,  $\omega_a$  (Galtier 2016) combines the proportion ( $p_b$ ) and the mean  
446 strength of beneficial mutations ( $S_b$ ) according to  $\omega_a = p_b \times S_b / (1 - \exp(-S_b))$ .  
447 However, as for  $p_b$  the effect of  $\omega_a$  on  $\Delta$  was not significant (p-value=0.17)  
448 although the relationship is positive as expected.

449

#### 450 *Trends across the genome and tests for selection*

451

452 Variation of DFE parameters across bins could also explain the difference  
453 between  $\beta$  and  $b$  since the underlying assumption is that  $\beta$  is constant across bins.

454 We thus calculated  $\beta$  for all 20 bins for the 11 species. Seven species had  $\beta$  values  
455 increasing weakly with genetic diversity (p-value<0.05, mean regression  
456 coefficient 0.056) while *C. grandiflora* and *H. timareta* had a much faster increase  
457 (regression coefficient =0.2 and 0.15, respectively, Table 3). In five species, the  
458 slope was steeper than the maximum  $\beta$  value, similar to what was obtained by  
459 Castellano *et al.* (2018) in *Drosophila*. However, the slope was shallower than the  
460 maximum  $\beta$  value in the six remaining species and in five of them the maximum  $\beta$   
461 value was larger than 1 (Table 1). We also compared  $p_b$  and  $S_b$  values across bins.  
462 In *A. thaliana*  $p_b$  increased slowly with diversity whereas in *C. grandiflora*, *S.*  
463 *huaylasense*, and *D. melanogaster*  $p_b$  decreased significantly (p-value<0.05). In all  
464 11 species,  $S_b$  did not show any significant trend across bins. To more formally  
465 test for the significance of these variations, we also divided the genomes into five  
466 bins (to get enough power per bin) and tested the invariance of the DFE across  
467 bins using likelihood ratio tests as implemented in *polyDFE*. For all species, a  
468 model with independent DFE parameters for each bin is significantly better than  
469 a model with shared parameters across bins (see Table S4).

470

471 For all 11 selected species we also calculated Tajima's D (Tajima 1989),  
472 thereafter simply called D, in each bin to test for departure from neutrality  
473 across the genome. Mean values of D were slightly negative across bins for most  
474 species except *S. habrochaites*. For nine of the eleven species, D values increased  
475 significantly with genetic diversity (Table 3). Interestingly, we found a negative  
476 and strong correlation of Tajima's D with  $\log(S_b)$  for all 11 species (p-  
477 value=0.0086, Pearson's correlation coef. =-0.74) but not with any other DFE  
478 parameters. This is in agreement with the expectation that selective sweeps  
479 decrease D. Background selection could also decrease D albeit to a lower extent.  
480 We further tested the trends of positive and negative selection by calculating the  
481 proportions of deleterious or beneficial mutations over all bins with selective  
482 strength <-10 and >10, respectively. However, no significant trends were  
483 identified for either type of direct selection.

484

485 We also tested whether alternative measures of the possible occurrence of  
486 selective sweeps could explain a larger part of the variation in  $\Delta$ . We used both



487 the mean Tajima's D and the among-genome regression coefficient of the  
488 relationship between D and  $\pi_S$  ( $\rho_D$ ) as predictors. More negative D and stronger  
489 positive regression coefficient between D and  $\pi_S$  can be viewed as signature of  
490 stronger hitchhiking effects. So we would expect to see a negative effect of D and  
491 a positive effect of  $\rho_D$  on the variation in  $\Delta$ . In combination with  $\pi_S$  (or  $\hat{N}_e$ ), both  
492 D and  $\rho_D$  indeed explained a significant part of the variation in  $\Delta$  (adjusted  
493  $R^2=0.76$ , Table 2).

494

#### 495 *Simulations*

496

497 Castellano et al. (2018) used forward simulations to assess the extent to which  
498 selective sweeps made the slope the relationship between  $\log(\pi_N/\pi_S)$  and  $\log(\hat{N}_e)$   
499 steeper and thereby could explain the discrepancy between the slope and the  
500 shape parameter of the DFE,  $\beta$ . They tested varying proportions of adaptive  
501 mutations (their Fig. 5). We extended their investigation to test the effect of  
502 selective strength ( $s_b$ ) on  $b$  with a fixed  $\beta$  (0.4) and how selective strength ( $s_b$ )  
503 also affected estimates of Tajima's D. Without recombination ( $Nr=0$ ), Fig. 4  
504 shows that when  $s_b$  increased from 0.1 to 1,  $b$  increased from 0.46 to 0.72  
505 ( $\Delta=0.06$  to 0.32). As expected mean Tajima's D decreased from -0.36 to -0.77 as  
506  $s_b$  increased and  $\rho_D$  between D and  $\pi_S$  increased (see also Table 4). We also  
507 increased N from 100 to 500, and to 1000, and fixed the mean selective strength  
508 at either  $S_b = 10$  or  $S_d = -1000$ . With these parameters, the strength of selection  
509 was not affected by N but the number of sweeps increased with N due to the  
510 higher input of (beneficial) mutations. In this case  $\Delta$  increased from 0.06 to 0.41  
511 as N increased and Tajima's D again decreased (Table 4 and Fig. 5). With  
512 recombination ( $Nr=1e-3$  and  $Nr=1e-2$ ), we noticed similar trends of  $b$ , D, and  $\rho_D$   
513 when  $s_b$  or N are large enough to recover the significance of the linearity between  
514  $\log(\pi_N/\pi_S)$  and  $\log(\pi_S)$  (Fig. S2 and S3).

515

#### 516 **Discussion**

517

518 The aim of the present study was to test quantitatively one of the predictions of  
519 the Nearly Neutral Theory of molecular evolution or, more precisely, the slightly  
520 deleterious model. More specifically, we used full genome datasets to test  
521 whether the proportion of effectively neutral mutations varies with local  
522 variation in  $N_e$  across the genome and decreases linearly with increasing  $N_e$  and  
523 whether the slope is equal to the shape parameter of the DFE. The negative log  
524 linear relationship between  $\pi_N/\pi_S$  and  $N_e$  observed in previous studies  
525 (Gossmann et al. 2011; Murray et al. 2017; Castellano et al. 2018; Vigué and  
526 Eyre-Walker 2019) was also observed in the present study, although the slope  
527 was not always significantly negative and, when negative, could differ  
528 significantly from the shape parameter of the DFE and be much steeper. The  
529 latter was especially true in species with large effective population size and the  
530 difference was correlated to the estimated mean strength of selection acting on  
531 beneficial mutations. In the case of species with large effective population size  
532 neglecting linked positive selection could therefore lead to a significant  
533 quantitative discrepancy between predictions and observations. On the other  
534 hand, the slightly deleterious model appears as a good approximation when the  
535 effective population size is small. Below we first consider possible caveats and  
536 discuss the implications of the results for the relative importance of purifying  
537 and adaptive selection in shaping the genetic diversity of species.

538

539 The discrepancy between the slope of the log linear relationship between  $\pi_N/\pi_S$   
540 and  $N_e$  and  $\beta$  could simply be due to difficulties in estimating them precisely. In  
541 general, estimates of the DFE shape parameter,  $\beta$ , were rather stable compared  
542 to estimates of the slope of the regression of  $\log(\pi_N/\pi_S)$  over  $\log(\pi_S)$ ,  $b$ , with the  
543 variance of the former being half that of the latter independently of quality  
544 control and whether the SFS was folded or unfolded. High variation in  $b$   
545 estimates may explain the fact that a significant correlation between  $\pi_N/\pi_S$  and  
546  $\pi_S$  could not be observed for all species, particularly those with low genetic  
547 diversity (e.g. great apes). Therefore, a stringent quality control for read  
548 alignment and SNP calling is necessary, even for *D. melanogaster*, where an  
549 improvement of the fit in  $l$  calculation (linear regression adjusted  $R^2=0.79$  to  $0.95$ )  
550 leads to a dramatic change in the estimate of  $\Delta$  (from 0.077 to 0.29). Even if a

551 stringent quality control had been implemented, the goodness of fit for the log  
552 linear regression leading to the estimation of  $b$  would differ significantly from  
553 species to species. The fit across the *D. melanogaster* and *A. thaliana* genomes  
554 was almost perfect ( $R^2 > 0.95$ ) while, at the other extreme, the fit was rather poor  
555 in *S. habrochaites* ( $R^2 = 0.38$ ). However, even among species for which the fit is  
556 almost perfect ( $R^2 > 0.95$ )  $b$  could vary rather dramatically: *D. melanogaster* had a  
557 much larger  $l$  (0.7) than *A. thaliana* (0.48), *C. rubella* (0.43), and *Z. mays* (teosinte,  
558 0.29), whereas  $\beta$  only changed marginally for these species. Not all species  
559 though showed a significant negative linear relationship between  $\pi_N/\pi_S$  and  $\hat{N}_e$   
560 and some even had positive slopes, especially for those of low diversity (e.g.  
561 great apes, Fig 2). Therefore, besides purifying selection the slope is also likely to  
562 be affected by additional factors. Factors that affect the likelihood to observe a  
563 negative relationship between  $\pi_N/\pi_S$  and  $\hat{N}_e$  and its relationship with the DFE  
564 parameters were thoroughly discussed by Castellano et al. (2018). Below we  
565 highlight those that seem particularly relevant when considering a group of  
566 species with contrasted levels of diversity as was done here. These factors are  
567 the variation in  $N_e$  estimates along the genome, which itself reflects the joint  
568 distribution along the genome of recombination rate and density of selected sites,  
569 the DFE, and the variation along the genome of the rate of adaptive evolution  
570 (Castellano et al. 2018).

571

572 Lack of joint variation in recombination rate and selected sites seems to be an  
573 unlikely cause for an absence of negative relationship between  $\pi_N/\pi_S$  and  $N_e$  as  
574 such a relationship is observed in selfing species where this joint variation is  
575 expected to be more limited than in outcrossing ones. A possible source of  
576 variance in  $\beta$  could be that the single-sided gamma distribution does not describe  
577 well the real DFE curves, at least not for all species, particularly when the DFE is  
578 not unimodal (Tataru et al. 2017). For species like *D. melanogaster*, for instance,  
579 there is mounting evidence of adaptive evolution (reviewed in Eyre-Walker 2006,  
580 Sella et al. 2009). Therefore, it is necessary to consider the possible contribution  
581 of beneficial mutations. The full DFE model provided a much better fit than the  
582 gamma DFE that considers only deleterious mutations in *D. melanogaster* (log

583 likelihood= -187.3 versus -245.7, respectively). This was also true of some of the  
584 outcrossing plants like *Capsella grandiflora*, and *Solanum huaylasense*. In all three  
585 species  $\beta$  estimates increased when estimated with the Full DFE instead of the  
586 Gamma DFE, sometimes significantly (from 0.33 to 0.41 in *D. melanogaster*  
587 (Rwanda) and 0.15 to 0.31 in *S. huaylasense*) and at other times only marginally  
588 (0.27 to 0.30 in *C. grandiflora*). Taking beneficial mutations into account when  
589 fitting the shape of the DFE can partly reduce the discrepancy between  $\beta$   
590 estimates and the slope of the regression. However, it is not sufficient as  $\Delta$  was  
591 positive in 10 over the 11 focal species we studied.

592

593 Based on the prediction of the Nearly Neutral Theory with direct positive  
594 selection (Equation 2), the proportion of beneficial mutations is the only factor  
595 that could alter the relationship between  $b$  and  $\beta$  and should always result in a  
596 larger  $\beta$  compared to  $b$ . However, this is usually not the case as, on the contrary,  
597 values of  $b$  larger than  $\beta$  have generally been reported (Chen *et al.* 2017; James *et*  
598 *al.* 2017; Castellano *et al.* 2018). In this paper we systematically investigated this  
599 relationship across the genomes of multiple species. Two thirds of the 59 species  
600 and 10 out of the subset of eleven species that were selected for the high quality  
601 of their genome, had larger  $b$  than  $\beta$  values. Hence direct positive selection is not  
602 the main cause of the discrepancy.

603

604 Investigation of DFE parameter changes across bins may help to identify changes  
605 in natural selection. Increasing  $\beta$  values over bins could be a signal for stronger  
606 positive selection in low diversity regions. Although the maximum  $\beta$  value of  
607 some species can be larger than  $b$ ,  $\beta$  grows slowly for most species and shows  
608 hardly any pattern between species. Neither did  $p_b$  or  $S_b$ . This lack of significant  
609 trend in these parameters could simply be due to an increase in variance of their  
610 estimates as only one twentieth of the total number of polymorphic sites were  
611 used for DFE calculations in each bin. It could also again suggest that direct  
612 selection is not the main cause of the discrepancy.

613

614 One of the main findings of the present study is that a large proportion of  
615 variance in the discrepancy can be explained by the estimated strength of

616 positive selection, which can be regarded as an indication for linked selection,  
617 such as selective sweeps or more generally hitchhiking effects. To test for that,  
618 we compared changes in Tajima's  $D$  and its among-genome correlation  
619 coefficients over bins. As expected we observed a negative effect of  $D$  and a  
620 positive effect of  $\rho_D$  on  $\Delta$ , both suggesting the presence of linked selection, with  
621 lower diversity at nearby sites and thus increased discrepancy between  $b$  and  $\beta$ .  
622 This is also in agreement with our simulations and those of Castellano et al.  
623 (2018) that illustrate that hitchhiking effects can lower the genetic diversity at  
624 nearby neutral or nearly neutral positions. These results can be understood  
625 because selective sweep effects cannot simply be captured by a rescaling of  $N_e$ .  
626 Selective sweeps not only reduce genetic diversity at linked sites but also distort  
627 the coalescent genealogy (Fay and Wu 2000; Walsh and Lynch 2018; Campos  
628 Parada and Charlesworth 2019), so that we cannot define a single  $N_e$  in this  
629 context (Weissman and Barton 2012). In particular, the scaling is not expected to  
630 be the same for neutral or weakly selected polymorphisms. However, as far as  
631 we know, there is no quantitative model predicting the value of the slope as a  
632 function of DFE, rates of sweep and recombination rates, and such models still  
633 need to be developed.

634

## 635 **Conclusions**

636

637 There are three major conclusions to the present study. First, the Nearly Neutral  
638 Theory in its initial form may not explain all aspects of polymorphisms but,  
639 almost 50 years after it was first proposed by Tomoko Ohta (Ohta 1973), it still  
640 constitutes an excellent starting point for further theoretical developments  
641 (Galtier 2016; Walsh and Lynch 2018). Second, considering linked beneficial  
642 selection indeed helps to explain more fully polymorphism data, and this is  
643 especially true for species with high genetic diversity. This can explain both  
644 patterns of synonymous polymorphism (Corbett-Detig et al. 2015) and how  
645 selection reduces non-synonymous polymorphism (Castellano et al. 2018, this  
646 study). One could have a progressive increase of the effect of selective sweeps as  
647 suggested by Walsh and Lynch (2018, chapter 8) with a shift from genetic drift to  
648 genetic draft (Gillespie 1999; 2000; 2001). If so, we could have three domains.

649 For small population sizes, drift would dominate and the nearly neutral theory in  
650 its initial form would apply. For intermediate population sizes beneficial  
651 mutations would start to play a more important part, and finally for large  
652 population sizes, the effect of selective sweeps would dominate and drift would  
653 be the main explanation of the observed pattern of diversity. Third, our study  
654 once more emphasizes the central importance of the DFE in evolutionary  
655 genomics and we will likely see further developments in this area.

656

657 **Acknowledgements:** We thank Thomas Bataillon and David Castellano for  
658 comments on earlier versions of the manuscript. The project was in part  
659 supported by grants from the Swedish Research Council and the Swedish  
660 Foundation for Strategic Research to ML.

661

662 **Data availability:** The vcf files used in the present study are available on request.

663

664 **Table 1** Species and datasets used in the present study

665

| Species                   | Ref.                               | Outgroup               | Ref.                                | Mating type | AIC                  | $b$  | $\beta_{full}$ | $\beta_{gamma}$ <sup>a</sup> | $\beta_{max}$ |
|---------------------------|------------------------------------|------------------------|-------------------------------------|-------------|----------------------|------|----------------|------------------------------|---------------|
| <i>A. thaliana</i>        | ALONSO-BLANCO <i>et al.</i> (2016) | <i>A. lyrata</i>       | (NOVIKOVA <i>et al.</i> 2016)       | selfing     | 231.3, 227.3         | 0.48 | 0.32           | 0.32                         | 0.45          |
| <i>A. lyrata</i>          | (NOVIKOVA <i>et al.</i> 2016)      | <i>A. thaliana</i>     | ALONSO-BLANCO <i>et al.</i> (2016)  | outcrossing | 247.4, 243.4         | 0.50 | 0.35           | 0.34                         | 0.36          |
| <i>C. rubella</i>         | (KOENIG <i>et al.</i> 2018)        | <i>C. grandiflora</i>  | (AGREN <i>et al.</i> 2014)          | selfing     | 201.4, 200.3         | 0.43 | 0.39           | 0.26                         | 2.86          |
| <i>C. grandiflora</i>     | (AGREN <i>et al.</i> 2014)         | <i>C. rubella</i>      | (KOENIG <i>et al.</i> 2018)         | outcrossing | <b>321.9</b> , 327.8 | 0.52 | 0.30           | 0.27                         | 0.36          |
| <i>S. habrochaites</i>    | AFLITOS <i>et al.</i> (2014)       | <i>S. lycopersicon</i> | AFLITOS <i>et al.</i> (2014)        | selfing     | <b>141.5</b> , 148.1 | 0.21 | 0.23           | 0.13                         | 3.61          |
| <i>S. huaylasense</i>     | AFLITOS <i>et al.</i> (2014)       | <i>S. lycopersicon</i> | AFLITOS <i>et al.</i> (2014)        | outcrossing | <b>87.1</b> , 121.5  | 0.54 | 0.31           | 0.15                         | 3.89          |
| <i>S. propinquum</i>      | MACE <i>et al.</i> (2013)          | <i>S. bicolor</i>      | MACE <i>et al.</i> (2013)           | selfing     | 163.8, 159.8         | 0.37 | 0.26           | 0.26                         | 0.34          |
| <i>Z. mays</i> (teosinte) | CHIA <i>et al.</i> (2012)          | <i>T. dactyloides</i>  | CHIA <i>et al.</i> (2012)           | outcrossing | 208.1, 204.1         | 0.29 | 0.19           | 0.18                         | 0.45          |
| <i>P. trichocarpa</i>     | EVANS <i>et al.</i> (2014)         | <i>P. nigra</i>        | (FAIVRE-RAMPANT <i>et al.</i> 2016) | outcrossing | 318.9, 319.6         | 0.42 | 0.22           | 0.16                         | 2.21          |
| <i>D. melanogaster</i>    | HUANG <i>et al.</i> (2014)         | <i>D. simulans</i>     | STANLEY AND KULATHINAL (2016)       | outcrossing | <b>422.7</b> , 535.5 | 0.70 | 0.41           | 0.33                         | 0.51          |
| <i>H. timareta</i>        | MARTIN <i>et al.</i> (2013)        | <i>H. melpomene</i>    | MARTIN <i>et al.</i> (2013)         | outcrossing | 208.2, 204.2         | 0.44 | 0.21           | 0.21                         | 2.78          |

666 Note: AIC values were estimated by *polyDFE* for models with and without the effects of beneficial mutations, respectively (bold numbers showed significance <

667 0.05). The same applies to  $\beta_{full}$  and  $\beta_{gamma}$  as well.  $\beta_{max}$  corresponds to the maximum value of those estimated by *polyDFE* for each ranked gene bin.

668 **Table 2** Summary table of multiple regression analyses of the effects of  $\pi_S$ ,  $S_b$ ,  
 669 Tajima's D, and  $\rho_D$  on  $\Delta$ , the difference between  $b$  and  $\beta$ .

670

| $\Delta \sim \pi_S + \log_{10}(S_b)$ | <i>Coef.</i>                     | <i>SE</i> | <i>t value</i> | <i>p-value</i> |
|--------------------------------------|----------------------------------|-----------|----------------|----------------|
| Intercept                            | 0.14                             | 0.031     | 4.69           | 0.0016**       |
| $\pi_S$                              | 7.93                             | 2.96      | 2.68           | 0.028*         |
| $\log_{10}(S_b)$                     | 0.015                            | 3.6e-3    | 4.24           | 0.0029**       |
| p-value: 0.0008144                   | Adjusted R <sup>2</sup> : 0.7888 |           |                |                |
| $\Delta \sim \pi_S + D + \rho_D$     |                                  |           |                |                |
| Intercept                            | -0.031                           | 0.035     | -0.87          | 0.41           |
| Tajima's D                           | -0.10                            | 0.042     | -2.39          | 0.048*         |
| $\rho_D$                             | 0.0015                           | 6.05e-4   | 2.56           | 0.038*         |
| $\pi_S$                              | 15.80                            | 3.39      | 4.65           | 0.0040**       |
| p-value: 0.002978                    | Adjusted R <sup>2</sup> : 0.708  |           |                |                |

671

672 \*\*\*:  $p < 0.001$ , \*\*:  $0.001 < p < 0.01$ , \*:  $0.01 < p < 0.05$ , ∙:  $0.05 < p < 0.1$

673

674

675

676

677

678

679

680

681

682

683

684

685

686

687

688

689

690

691

692

693

694

695

696

697

698

699



700 **Table 3** Changes of summary statistics and DFE parameters across 20 rank gene  
 701 groups.  
 702

|                        | Tajima's D |                      | $\rho\beta^a$        | $\rho p_b^a$            |
|------------------------|------------|----------------------|----------------------|-------------------------|
|                        | median     | $\rho D^a$           |                      |                         |
| <i>A. thaliana</i>     | -0.38      | 20.10 <sup>***</sup> | 0.033 <sup>***</sup> | 9.65e-4 <sup>**</sup>   |
| <i>A. lyrata</i>       | -0.60      | 30.13 <sup>***</sup> | 0.057 <sup>*</sup>   | 7.75e-5                 |
| <i>C. rubella</i>      | -0.28      | 15.75 <sup>*</sup>   | 0.039 <sup>*</sup>   | 8.26e-4                 |
| <i>C. grandiflora</i>  | -1.06      | 23.02 <sup>**</sup>  | 0.20 <sup>***</sup>  | -3.53e-3 <sup>*</sup>   |
| <i>S. habrochaites</i> | 0.22       | -5.36                | 0.11                 | -7.48e-3                |
| <i>S. huaylasense</i>  | -0.17      | -8.59 <sup>**</sup>  | -0.32                | -5.54e-2 <sup>***</sup> |
| <i>S. propinquum</i>   | -0.10      | 60.04 <sup>***</sup> | 0.075 <sup>***</sup> | 1.82e-3                 |
| <i>Z. mays</i>         | -0.52      | -0.39                | 0.055 <sup>***</sup> | 2.39e-3                 |
| <i>P. trichocarpa</i>  | -0.43      | 79.20 <sup>***</sup> | 0.079                | -2.80e-3                |
| <i>D. melanogaster</i> | -0.73      | 7.41 <sup>**</sup>   | 0.078 <sup>***</sup> | -3.81e-3 <sup>***</sup> |
| <i>H. timareta</i>     | -0.10      | 6.58 <sup>**</sup>   | 0.15 <sup>***</sup>  | 9.87e-4                 |

703  
 704 a:  $\rho$  is the slope of the regression of D ( $\beta$ , and  $p_b$ , respectively) over genetic  
 705 diversity across ranked groups of genes.

706 \*\*\*:  $p < 0.001$ , \*\*:  $0.001 < p < 0.01$ , \*:  $0.01 < p < 0.05$ ,  $\cdot$ :  $0.05 < p < 0.1$

707  
 708  
 709  
 710  
 711  
 712  
 713  
 714  
 715  
 716  
 717  
 718  
 719  
 720  
 721  
 722  
 723  
 724  
 725  
 726  
 727  
 728  
 729  
 730

731  
732  
733  
734

**Table 4** Results of forward simulations showing the effect of linked positive selection on  $b$ ,  $\Delta$  and summary statistics of the site frequency spectrum for different values of the mean selective value of beneficial mutations,  $S_b$  and the population size,  $N$ .  $\rho_D$  is the correlation between  $\pi_S$  and Tajima's  $D$ .

|         | $N$  | $S_b$ | $S_d$ | $\beta$ | $b$  | $\Delta$ | $\pi_S$ | $\pi_N/\pi_S$ | $\rho_D$ | TD     |
|---------|------|-------|-------|---------|------|----------|---------|---------------|----------|--------|
| Nr=0    | 100  | 20    | 1000  | 0.4     | 0.49 | 0.09     | 1.39    | 0.091         | 874.6    | -0.46  |
|         | 100  | 50    | 1000  | 0.4     | 0.61 | 0.21     | 1.18    | 0.094         | 909.9    | -0.70  |
|         | 100  | 100   | 1000  | 0.4     | 0.72 | 0.32     | 1.06    | 0.111         | 994.2    | -0.77  |
|         | 100  | 10    | 1000  | 0.4     | 0.46 | 0.06     | 1.52    | 0.082         | 739.9    | -0.36  |
|         | 500  | 10    | 1000  | 0.4     | 0.65 | 0.25     | 5.72    | 0.09          | 228.6    | -0.77  |
|         | 1000 | 10    | 1000  | 0.4     | 0.81 | 0.41     | 10.35   | 0.094         | 132.4    | -0.92  |
| Nr=1e-3 | 100  | 20    | 1000  | 0.4     | 0.06 | -0.34    | 1.64    | 0.076         | 662.5    | -0.18  |
|         | 100  | 50    | 1000  | 0.4     | 0.63 | 0.23     | 1.48    | 0.087         | 738.1    | -0.28  |
|         | 100  | 100   | 1000  | 0.4     | 0.72 | 0.32     | 1.17    | 0.097         | 966.8    | -0.58  |
|         | 100  | 10    | 1000  | 0.4     | 0.09 | 0.031    | 1.70    | 0.075         | 1011.1   | -0.12  |
|         | 500  | 10    | 1000  | 0.4     | 0.61 | 0.21     | 7.54    | 0.084         | 163.9    | -0.26  |
|         | 1000 | 10    | 1000  | 0.4     | 0.68 | 0.28     | 13.67   | 0.083         | 99.7     | -0.37  |
| Nr=1e-2 | 100  | 20    | 1000  | 0.4     | 0.43 | 0.03     | 1.74    | 0.077         | 739.3    | -0.048 |
|         | 100  | 50    | 1000  | 0.4     | 0.63 | 0.23     | 1.67    | 0.081         | 917.6    | -0.12  |
|         | 100  | 100   | 1000  | 0.4     | 0.78 | 0.38     | 1.61    | 0.084         | 898.4    | -0.15  |
|         | 100  | 10    | 1000  | 0.4     | 0.33 | -0.07    | 1.76    | 0.080         | 325.7    | -0.011 |
|         | 500  | 10    | 1000  | 0.4     | 0.69 | 0.29     | 8.55    | 0.073         | 165.4    | -0.06  |

1000 10 1000 0.4 0.99 0.59 16.7 0.072 86.3 -0.12

---

735  
736  
737

Figures

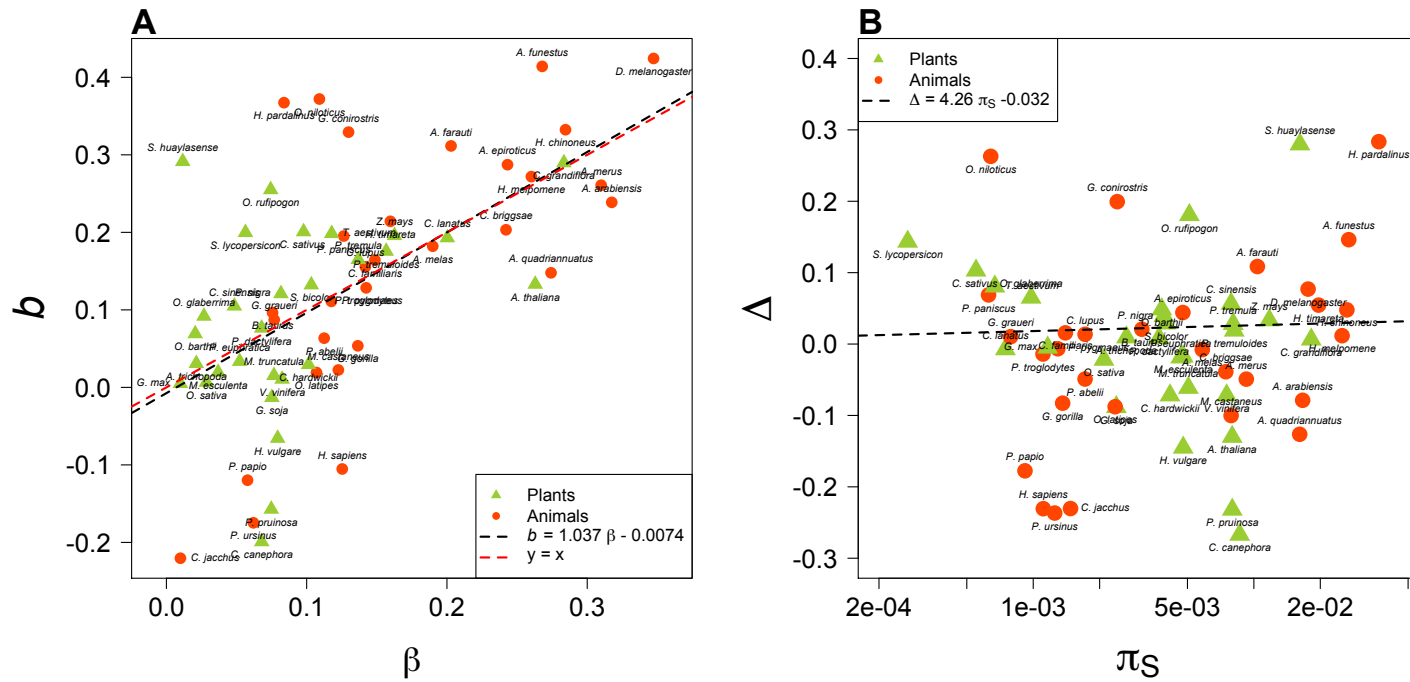

738  
739  
740  
741  
742

**Fig. 1** (A) The correlation between  $b$  and the shape parameter of the DFE,  $\beta$ , from the 59 species in Chen *et al.* (2017). The observed slope of the regression of  $\log(\pi_N/\pi_S)$  over  $\log(\pi_S)$ ,  $l=-b$ . (B) The distribution of  $\Delta (=b-\beta)$  against genetic diversity at synonymous sites.  $\beta$  values were estimated from DFE models with only deleterious mutations considered (the gamma distribution).

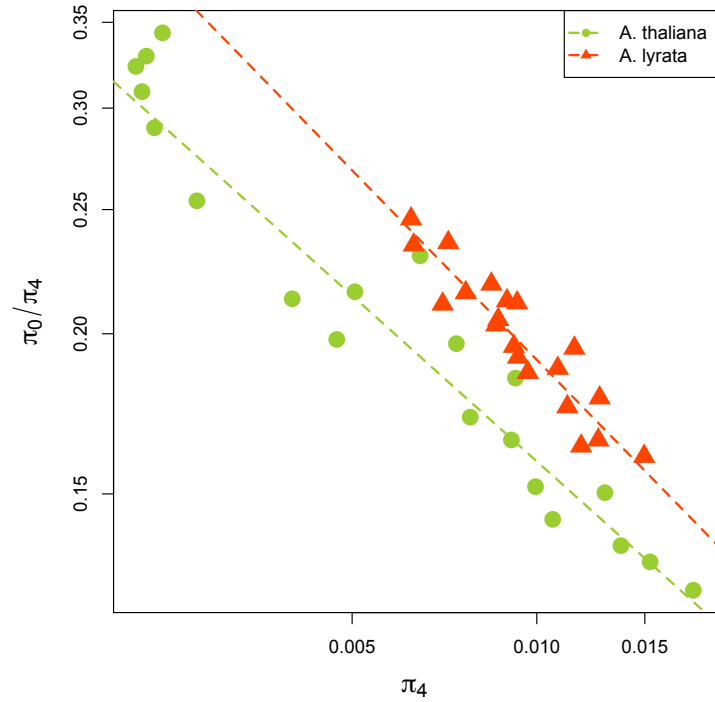

743

744 **Fig. 2** The regression of  $\log(\pi_N/\pi_S)$  over  $\log(\pi_S)$  for self-fertilizing *Arabidopsis thaliana* (dots) and its outcrossing relative *A. lyrata*

745 (triangles).

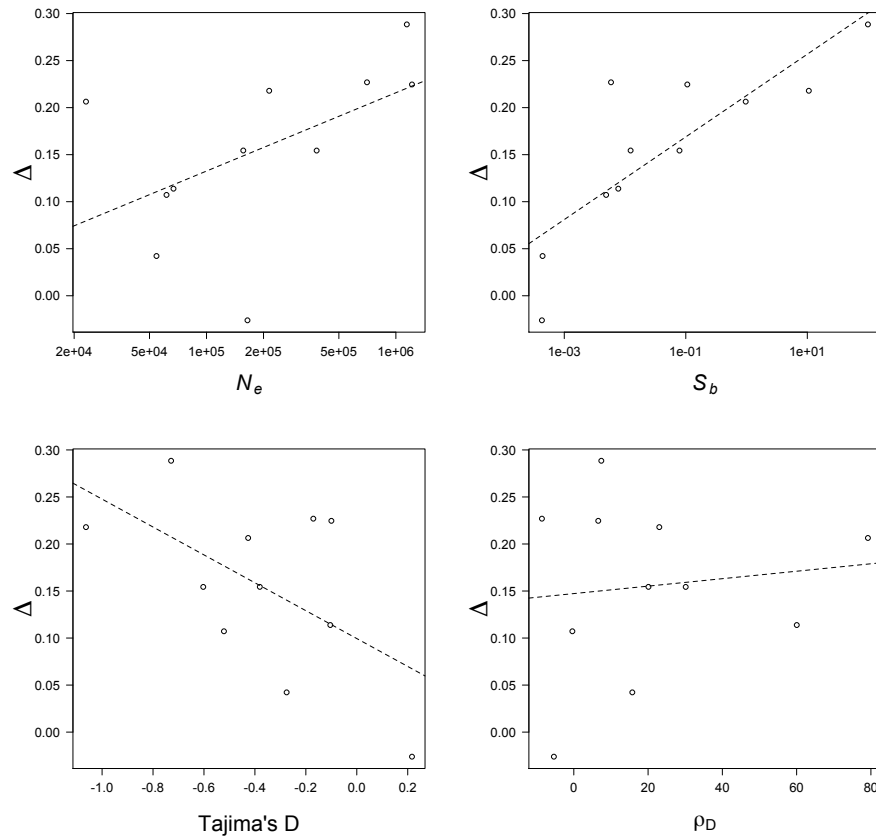

746

747 **Fig. 3** The relationship between  $\Delta$  ( $=b-\beta$ ) and effective population size,  $N_e$ , selective strength,  $S_b$ , Tajima's D and the trend of D across  
 748 bins  $\rho_D$  for 11 selected species. Dotted lines showed the linear regression line.  $\beta$  and  $S_b$  values were estimated from full DFE models with  
 749 both deleterious and beneficial mutations considered (full DFE model with both gamma and exponential distributions).

750

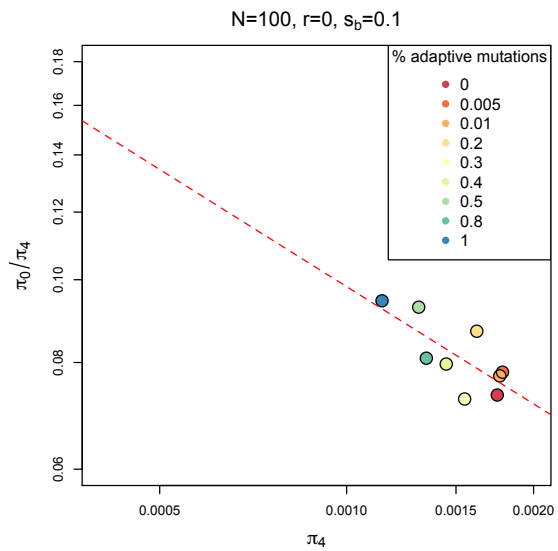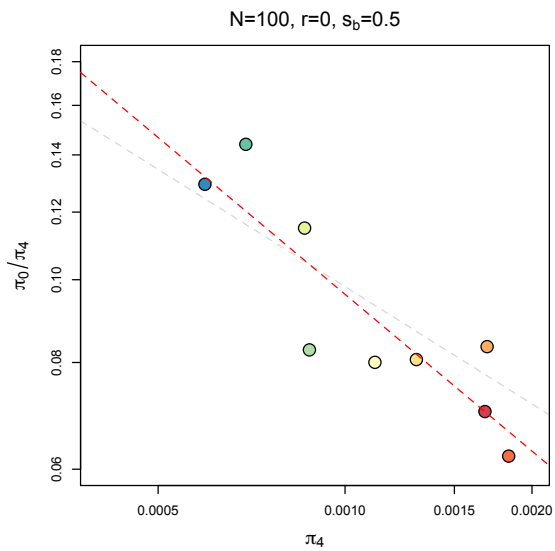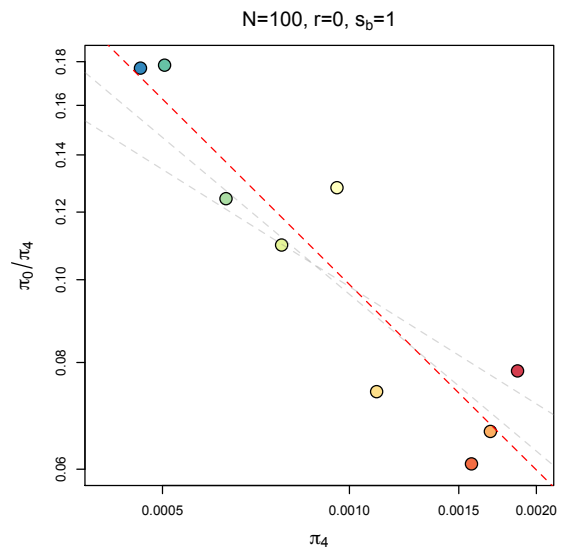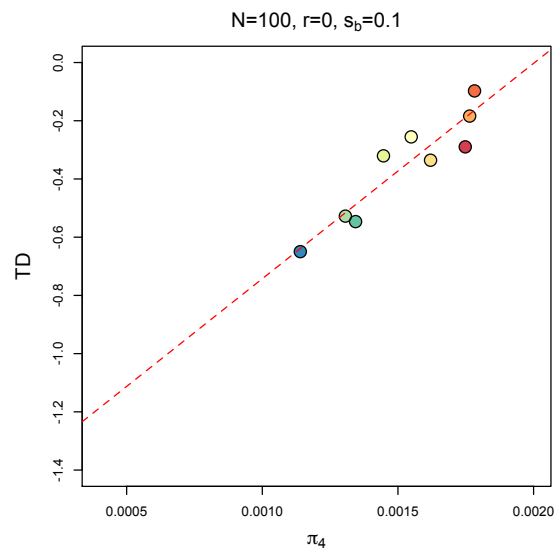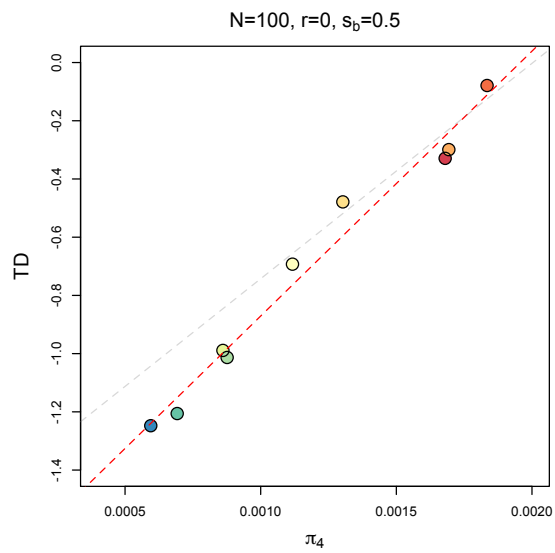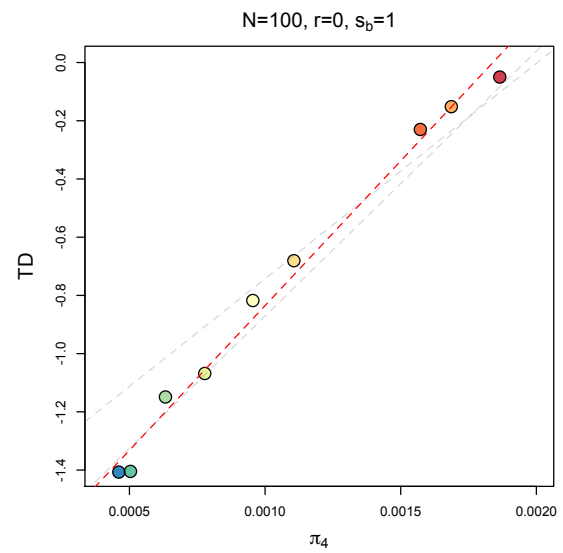

752 **Fig. 4** Effect of linked positive selection on the relationship between  $\log(\pi_N/\pi_S)$  and  $\log(N_e)$  and Tajima's D. Upper row: The linear  
753 regression coefficient ( $b$ ) between  $\log(\pi_N/\pi_S)$  and  $\log(N_e)$  increases with increasing positive selective strength (from left to right). The  
754 red lines are the regression lines for each case. To facilitate comparisons among figures, and illustrate how the slope gets steeper as  $s_b$   
755 increases the regression lines corresponding to  $s_b=0.1$  and/or  $s_b=0.5$  values are reported with gray lines. Lower row: The red lines for  
756 Tajima's D panels indicate the mean values.

757



758

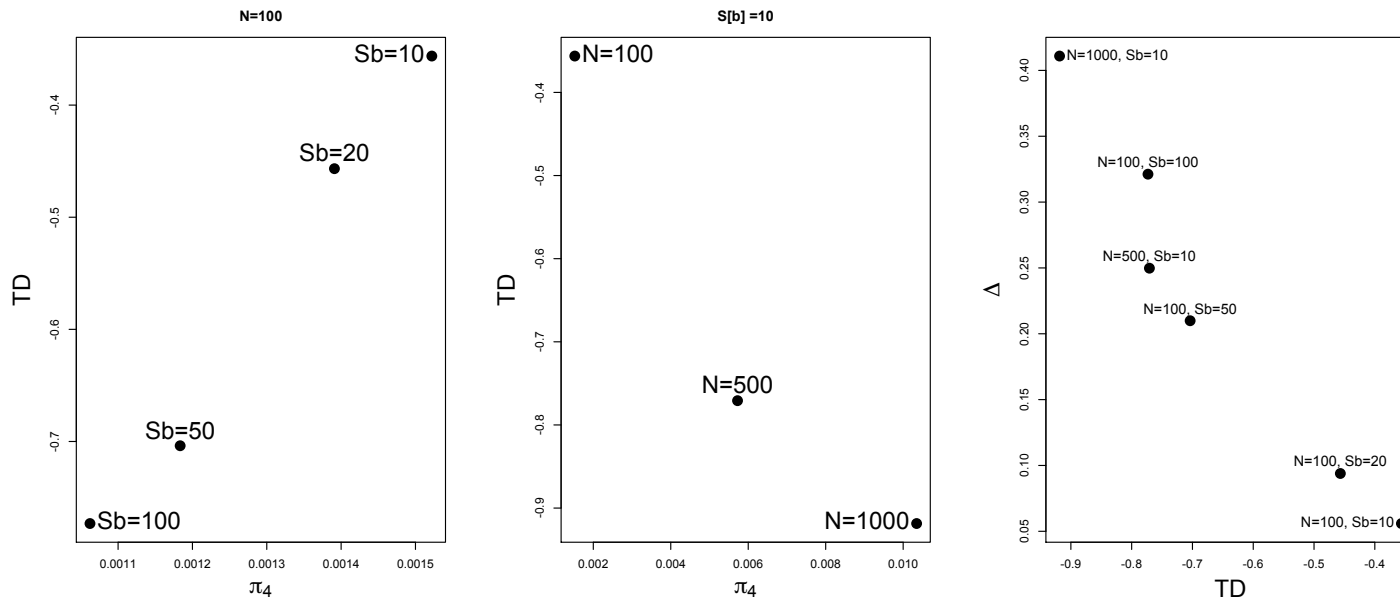

759

760 **Fig. 5** The correlation between Tajima's D and  $\pi_4$  depending on  $S_b$  (left panel) and  $N$  (middle panel); Correlation between  $\Delta$  and Tajima's  
761 D (right panel). In all three cases the results were obtained with forward simulations in Slim assuming no recombination.

762

763

764 **Supplementary Information**

765 **Supplementary table**

766

767

768 **Supplementary table legends**

769

770 **Table S1.** The 59 species used to compare the difference between  $-l$  and  $\beta$  assuming a gamma model for DFE. See Chen et al. (2017) for  
771 further details.

772

773 **Table S2.** Details of the 11 species used in the current study to compare the difference between  $-l$  and  $\beta$  assuming a full model (gamma +  
774 exponential) for the DFE.

775

776 **Table S3.** Mutation rates used for 11 species used in the current study for estimation of  $N_e$ .

777

778 **Table S4.** Test for the invariance of DFE parameter estimates across bins by comparing the log-likelihoods of independent estimates for each  
779 bin against those of shared estimates.

780

781

782

783

784

## 785 References

- 786 Aflitos, S., E. Schijlen, H. de Jong, D. de Ridder, S. Smit *et al.*, 2014 Exploring  
787 genetic variation in the tomato (*Solanum section Lycopersicon*) clade by  
788 whole-genome sequencing. *Plant Journal* 80: 136-148.
- 789 Agren, J. A., W. Wang, D. Koenig, B. Neuffer, D. Weigel *et al.*, 2014 Mating system  
790 shifts and transposable element evolution in the plant genus *Capsella*.  
791 *Bmc Genomics* 15.
- 792 Alonso-Blanco, C., J. Andrade, C. Becker, F. Bemm, J. Bergelson *et al.*, 2016 1,135  
793 Genomes Reveal the Global Pattern of Polymorphism in *Arabidopsis*  
794 *thaliana*. *Cell* 166: 481-491.
- 795 Barton, N. H., 1995 Linkage and the Limits to Natural-Selection. *Genetics* 140:  
796 821-841.
- 797 Brandvain, Y., & Wright, S. I. 2016 The limits of natural selection in a  
798 nonequilibrium world. *Trends in Genetics* 32:201–210.
- 799 Campos Parada, J. L., and B. Charlesworth, 2019 The effects on neutral variability  
800 of recurrent selective sweeps and background selection. *bioRxiv*: 358309.
- 801 Carson, A. R., E. N. Smith, H. Matsui, S. K. Braekkan, K. Jepsen *et al.*, 2014 Effective  
802 filtering strategies to improve data quality from population-based whole  
803 exome sequencing studies. *Bmc Bioinformatics* 15.
- 804 Castellano, D., J. James and A. Eyre-Walker, 2018 Nearly Neutral Evolution Across  
805 the *Drosophila melanogaster* Genome. *Molecular Biology and Evolution*:  
806 msy164-msy164.
- 807 Charlesworth, B., M. T. Morgan and D. Charlesworth, 1993 The Effect of  
808 Deleterious Mutations on Neutral Molecular Variation. *Genetics* 134:  
809 1289-1303.
- 810 Chen, J., S. Glemin and M. Lascoux, 2017 Genetic Diversity and the Efficacy of  
811 Purifying Selection across Plant and Animal Species. *Molecular Biology*  
812 *and Evolution* 34: 1417-1428.
- 813 Chia, J. M., C. Song, P. J. Bradbury, D. Costich, N. de Leon *et al.*, 2012 Maize  
814 HapMap2 identifies extant variation from a genome in flux. *Nature*  
815 *Genetics* 44: 803-U238.
- 816 Comeron, J.M. 2017 Background selection as null hypothesis in population  
817 genomics: insights and challenges from *Drosophila* studies. *Phil. Trans. R.*  
818 *Soc. B* 372: 20160471.
- 819 Coop, G. 2016 Does linked selection explain the narrow range of genetic diversity  
820 across species? *bioRxiv* doi: <https://doi.org/10.1101/042598>.
- 821 Corbett-Detig, R. B., D. L. Hartl and T. B. Sackton, 2015 Natural Selection  
822 Constrains Neutral Diversity across A Wide Range of Species. *Plos Biology*  
823 13.
- 824 Cvijovic, I., B.H. Good and M.M. Desai, 2018 The effect of strong purifying  
825 selection on genetic diversity. *Genetics* 209: 1235-1278.
- 826 Do, R., D. Balick, H. Li, I. Adzhubei, S. Sunyaev and D. Reich 2015 No evidence that  
827 selection has been less effective at removing deleterious mutations in  
828 Europeans than in Africans. *Nature genetics* 47: 126
- 829 Ellegren, H., and N. Galtier, 2016 Determinants of genetic diversity. *Nature*  
830 *Reviews Genetics* 17: 422-433.
- 831 Evans, L. M., G. T. Slavov, E. Rodgers-Melnick, J. Martin, P. Ranjan *et al.*, 2014  
832 Population genomics of *Populus trichocarpa* identifies signatures of  
833 selection and adaptive trait associations. *Nature Genetics* 46: 1089-1096.

- 834 Eyre-Walker, A., 2006 The genomic rate of adaptive evolution. *Trends in Ecology*  
835 & *Evolution* 21: 569-575.
- 836 Eyre-Walker, A., and P. D. Keightley, 2007 The distribution of fitness effects of  
837 new mutations. *Nature Reviews Genetics* 8: 610-618.
- 838 Eyre-Walker, A., and P. D. Keightley, 2009 Estimating the Rate of Adaptive  
839 Molecular Evolution in the Presence of Slightly Deleterious Mutations and  
840 Population Size Change. *Molecular Biology and Evolution* 26: 2097-2108.
- 841 Faivre-Rampant, P., G. Zaina, V. Jorge, S. Giacomello, V. Segura *et al.*, 2016 New  
842 resources for genetic studies in *Populus nigra*: genome-wide SNP  
843 discovery and development of a 12k Infinium array. *Molecular Ecology*  
844 *Resources* 16: 1023-1036.
- 845 Fay, J. C., and C. I. Wu, 2000 Hitchhiking under positive Darwinian selection.  
846 *Genetics* 155: 1405-1413.
- 847 Galtier, N., 2016 Adaptive Protein Evolution in Animals and the Effective  
848 Population Size Hypothesis. *Plos Genetics* 12.
- 849 Gillespie, J. H., 1999 The role of population size in molecular evolution.  
850 *Theoretical Population Biology* 55: 145-156.
- 851 Gillespie, J. H., 2000 Genetic drift in an infinite population: The  
852 pseudohitchhiking model. *Genetics* 155: 909-919.
- 853 Gillespie, J. H., 2001 Is the population size of a species relevant to its evolution?  
854 *Evolution* 55: 2161-2169.
- 855 Gillespie, J. H., 2004 *Population genetics : a concise guide*. Johns Hopkins  
856 University Press, Baltimore, Md.
- 857 Gordo, I., Dionisio, F. 2005 Nonequilibrium model for estimating parameters of  
858 deleterious mutations. *Physical Review. E, Statistical, Nonlinear, and Soft*  
859 *Matter Physics* 71: 031907.
- 860 Gossmann, T. I., Woolfit, M., Eyre-Walker, A. 2011 Quantifying the variation in the  
861 effective population size within a genome. *Genetics* 189:1389-1402.
- 862 Haller, B. C., and P. W. Messer, 2019 SLiM 3: Forward Genetic Simulations  
863 Beyond the Wright-Fisher Model. *Molecular Biology and Evolution* 36:  
864 632-637.
- 865 Huang, W., A. Massouras, Y. Inoue, J. Peiffer, M. Ramia *et al.*, 2014 Natural  
866 variation in genome architecture among 205 *Drosophila melanogaster*  
867 Genetic Reference Panel lines. *Genome Research* 24: 1193-1208.
- 868 James, J., D. Castellano and A. Eyre-Walker, 2017 DNA sequence diversity and the  
869 efficiency of natural selection in animal mitochondrial DNA. *Heredity* 118:  
870 88-95.
- 871 Jensen, J. D., B.A. Payseur, W. Stephan, C.F. Aquadro, M. Lynch *et al.*, 2018 The  
872 Importance of the Neutral Theory in 1968 and 50 years on. [submitted].
- 873 Jensen, J. D., Y. Kim, V. B. DuMont, C. F. Aquadro and C. D. Bustamante, 2005  
874 Distinguishing between selective sweeps and demography using DNA  
875 polymorphism data. *Genetics* 170: 1401-1410.
- 876 Jensen, J. D., B. A. Payseur, W. Stephan, C. F. Aquadro, M. Lynch *et al.*, 2019 The  
877 importance of the Neutral Theory in 1968 and 50 years on: A response to  
878 Kern and Hahn 2018. *Evolution* 73: 111-114.
- 879 Kern, A. D., and M. W. Hahn, 2018 The Neutral Theory in Light of Natural  
880 Selection. *Molecular Biology and Evolution* 35: 1366-1371.

- 881 Kimura, M., 1979 Model of Effectively Neutral Mutations in Which Selective  
882 Constraint Is Incorporated. *Proceedings of the National Academy of*  
883 *Sciences of the United States of America* 76: 3440-3444.
- 884 Kimura, M., 1983 *The Neutral Theory of Molecular Evolution*. Cambridge, UK:  
885 Cambridge Univ. Press.
- 886 Kimura, M., and T. Ohta, 1971 Protein Polymorphism as a Phase of Molecular  
887 Evolution. *Nature* 229: 467-&.
- 888 Koenig, D., J. Hagmann, R. Li, F. Bemm, T. Slotte *et al.*, 2018 Long-term balancing  
889 selection drives evolution of immunity genes in *Capsella*. bioRxiv.
- 890 Kreitman, M., 1996 The neutral theory is dead. Long live the neutral theory.  
891 *Bioessays* 18: 678-683.
- 892 Li, H., and R. Durbin, 2010 Fast and accurate long-read alignment with Burrows-  
893 Wheeler transform. *Bioinformatics* 26: 589-595.
- 894 Mace, E. S., S. S. Tai, E. K. Gilding, Y. H. Li, P. J. Prentis *et al.*, 2013 Whole-genome  
895 sequencing reveals untapped genetic potential in Africa's indigenous  
896 cereal crop sorghum. *Nature Communications* 4.
- 897 Martin, S. H., K. K. Dasmahapatra, N. J. Nadeau, C. Salazar, J. R. Walters *et al.*, 2013  
898 Genome-wide evidence for speciation with gene flow in *Heliconius*  
899 butterflies. *Genome Research* 23: 1817-1828.
- 900 McKenna, A., M. Hanna, E. Banks, A. Sivachenko, K. Cibulskis *et al.*, 2010 The  
901 Genome Analysis Toolkit: A MapReduce framework for analyzing next-  
902 generation DNA sequencing data. *Genome Research* 20: 1297-1303.
- 903 Murray, G.G.R., A. E. R. Soares, B. J. Novak, N. K. Schaefer, J. A. Cahill, A. J. Baker, J.  
904 R. Demboski, A. Doll, R. R. Da Fonseca, T. L. Fulton, M. T. P. Gilbert, P. D.  
905 Heintzman, B. Letts, G. McIntosh, B.L. O'Connell, M. Peck, M.-L. Pipes, E. S.  
906 Rice, K. M. Santos, A. G. Sohrweide, S. H. Vohr, R. B. Corbett-Detig, R. E.  
907 Green and B. Shapiro 2017 Natural selection shaped the rise and fall of  
908 passenger pigeon genomic diversity. *Science* 358(6365), 951-954.
- 909 Nei, M., Y. Suzuki and M. Nozawa, 2010 The Neutral Theory of Molecular  
910 Evolution in the Genomic Era. *Annual Review of Genomics and Human*  
911 *Genetics*, Vol 11 11: 265-289.
- 912 Novikova, P. Y., N. Hohmann, V. Nizhynska, T. Tsuchimatsu, J. Ali *et al.*, 2016  
913 Sequencing of the genus *Arabidopsis* identifies a complex history of  
914 nonbifurcating speciation and abundant trans-specific polymorphism.  
915 *Nature Genetics* 48: 1077-+.
- 916 Ohta, T., 1972 Population Size and Rate of Evolution. *Journal of Molecular*  
917 *Evolution* 1: 305-314.
- 918 Ohta, T., 1973 Slightly Deleterious Mutant Substitutions in Evolution. *Nature*  
919 246: 96-98.
- 920 Ohta,T., 1977 Extension to the neutral mutation random drift hypothesis, pp.  
921 148-167 in *Molecular Evolution and Polymorphism*, edited by M. Kimura  
922 National Institute of Genetics, Mishima, Japan.
- 923 Ohta, T., 1992 The Nearly Neutral Theory of Molecular Evolution. *Annual Review*  
924 *of Ecology and Systematics* 23: 263-286.
- 925 Ohta, T., and J. H. Gillespie, 1996 Development of neutral and nearly neutral  
926 theories. *Theoretical Population Biology* 49: 128-142.
- 927 Pavlidis, P., and N. Alachiotis, 2017 A survey of methods and tools to detect  
928 recent and strong positive selection. *Journal of Biological Research-*  
929 *Thessaloniki* 24.

- 930 Posada, D., and T. R. Buckley, 2004 Model selection and model averaging in  
931 phylogenetics: Advantages of akaike information criterion and Bayesian  
932 approaches over likelihood ratio tests. *Systematic Biology* 53: 793-808.
- 933 R Core Team, 2018 R: A language and environment for statistical computing. R  
934 Foundation for Statistical Computing, pp. R Foundation for Statistical  
935 Computing, Vienna, Austria.
- 936 Rousselle, M., M. Mollion, B. Nabholz, T. Bataillon, and N. Galtier, 2018  
937 Overestimation of the adaptive substitution rate in fluctuating  
938 populations. *Biology Letters*, 14(5).
- 939 Sella, G., D.A. Petrov, M. Przeworski and P. Andolfatto 2009 Pervasive natural  
940 selection in the Drosophila genome? *PLoS genetics* 5: e1000495
- 941 Stanley, C. E., and R. J. Kulathinal, 2016 Genomic signatures of domestication on  
942 neurogenetic genes in *Drosophila melanogaster*. *Bmc Evolutionary*  
943 *Biology* 16.
- 944 Tajima, F., 1989 Statistical-Method for Testing the Neutral Mutation Hypothesis  
945 by DNA Polymorphism. *Genetics* 123: 585-595.
- 946 Tataru, P., M. Mollion, S. Glemin and T. Bataillon, 2017 Inference of Distribution  
947 of Fitness Effects and Proportion of Adaptive Substitutions from  
948 Polymorphism Data. *Genetics* 207: 1103-1119.
- 949 Torres, R., M.G. Stetter, R.D. Hernandez and J. Ross-Ibarra, 2019 The temporal  
950 dynamics of background selection in non-equilibrium populations.  
951 *BioRxiv* doi: <https://doi.org/10.1101/618389>
- 952 Vigué L, Eyre-Walker A. 2019 The comparative population genetics of  
953 *Neisseria meningitidis* and *Neisseria gonorrhoeae*. *PeerJ* 7:e7216
- 954 Walsh, B., and M. Lynch, 2018 *Evolution and Selection of Quantitative Traits*.  
955 Oxford University Press .
- 956 Weissman, D. B., and N. H. Barton, 2012 Limits to the Rate of Adaptive  
957 Substitution in Sexual Populations. *Plos Genetics* 8.
- 958 Welch, J. J., A. Eyre-Walker and D. Waxman, 2008 Divergence and Polymorphism  
959 Under the Nearly Neutral Theory of Molecular Evolution. *Journal of*  
960 *Molecular Evolution* 67: 418-426.
- 961 Zeng, K. 2013. A coalescent model of background selection with recombination,  
962 demography and variation in selection coefficients. *Heredity* 110: 363-  
963 371  
964  
965  
966



968 **APPENDIX**

969

970 In a constant population with population size  $N_e$ ,  $\pi_S = 4N_e\mu$  and  $\pi_N$  is given by  
 971 (Sawyer and Hartl 1992):

972 
$$\pi_N = 2N_e\mu \int_0^1 2x(1-x)H(S, x)dx \quad (A1)$$

973 where

974 
$$H(S, x) = \frac{1-e^{-S(1-x)}}{x(1-x)(1-e^{-S})} \quad (A2)$$

975 is the mean time a new semidominant mutation of scaled selection coefficient  $S =$   
 976  $4N_e s$  spends between  $x$  and  $x + dx$  (Wright 1938). For constant selection  $S$ , by  
 977 integrating (A1) and dividing by  $4N_e\mu$ , we have:

978 
$$\frac{\pi_N}{\pi_S} = f(S) = \frac{2}{1-e^{-S}} - \frac{2}{S} \quad (A3)$$

979 (A3) is valid for both positive and negative fitness effect. If we consider only  
 980 beneficial mutations with a gamma distribution of effects, with mean  $S_b$  and

981 shape  $\beta_b$ :  $\phi(S_b, \beta, S) = e^{-\frac{S\beta_b}{S_b}} S^{\beta-1} \left(\frac{\beta_b}{S_b}\right)^{\beta_b} / \Gamma(\beta_b)$ , we can use the same approach

982 as Welch et al. (2008) to show that:

983 
$$\frac{\pi_N}{\pi_S} = \int_0^{\infty} f(S) \phi(S_b, \beta_b, S) dS$$
  

$$= \frac{1}{\beta_b-1} \left(\frac{\beta_b}{S_b}\right)^{\beta_b} \left( \xi\left(\beta_b-1, \frac{\beta_b}{S_b}+1\right) + (\beta_b-1)\xi\left(\beta_b, \frac{\beta_b}{S_b}\right) - \xi\left(\beta_b-1, \frac{\beta_b}{S_b}\right) \right) \quad (A4)$$

984 where  $\xi(x, y)$  is the Hurwith Zeta function. (A4) can be approximated under the  
 985 realistic assumption that  $\frac{\beta_b}{S_b} \ll 1$  and taking Taylor expansion of (A4) in  $\frac{\beta_b}{S_b}$   
 986 around 0. We thus obtain:

987 
$$\frac{\pi_N}{\pi_S} \approx (2\pi)^{\beta_b} \left(\frac{S_b}{\beta_b}\right)^{\beta_b} \quad (A5)$$

988 which leads to equation [eq. 2] in the main text.
